# Supplementary material
Source: ML conference proceedings conference paper supplement (https://proceedings.mlr.press/v89/bu19a.html)
Supplement: Supplementary file 1 [file bu19a-supp.pdf]

---

# SMOGS: Social Network Metrics of Game Success

## Supplementary Material

---

Fan Bu

Sonia Xu

Katherine Heller

Alexander Volfovsky

Department of Statistical Science, Duke University

### A DERIVATION FOR THE PARAMETER INFERENCE ALGORITHM

Here we lay out the details of the full conditional distributions used in step 1 and step 2 in the sampling algorithm in Section 3.2.

Since not all the players are on the court all the time in a basketball game, parameters relevant to a player are inferred using only the observations at the moments when he was playing.

#### A.1 Full Conditionals for the Covariate Coefficients (Step 1)

For each player pair  $(i, j)$ , let  $\theta_{i,j}$  be the vector of all log-risks player  $i$  passing to  $j$  across all the games in the data. For each entry  $\theta_{i,j,g}(t)$  in the vector (suppose that the corresponding game is  $g$ ), let

$$\tilde{\theta}_{i,j,g}(t) = \theta_{i,j,g}(t) - u_{i,g}^T v_{j,g}, \quad (1)$$

and we have

$$\tilde{\theta}_{i,j,g}(t) = X_{i,j,g}(t)^T \beta_{i,j} + \epsilon_{i,j,g}(t). \quad (2)$$

Re-writing the above in matrix form (by stacking together all the entries across all the games), we get

$$\tilde{\theta}_{i,j} = \mathbf{X}_{i,j}^T \beta_{i,j} + \epsilon_{i,j}. \quad (3)$$

Then under the Gaussian model for independent errors  $\epsilon_{i,j,g}(t)$  and a normal prior for  $\beta_{i,j}$ ,

$$\begin{aligned} \epsilon_{i,j,g}(t) &\sim N(0, 1), \\ \beta_{i,j} &\sim N(b_{i,j}, \tau^2 I_7), \end{aligned} \quad (4)$$

$p(\beta_{i,j} | \Theta, \mathbf{U}, \mathbf{V})$  is a multivariate normal distribution,

$$\beta_{i,j} | \Theta, \mathbf{U}, \mathbf{V} \sim N(m_{i,j}, M_{i,j}), \quad (5)$$

where

$$\begin{aligned} M_{i,j} &= (I_7 / \tau^2 + \mathbf{X}_{i,j}^T \mathbf{X}_{i,j})^{-1}, \\ m_{i,j} &= M_{i,j} (b_{i,j} / \tau^2 + \mathbf{X}_{i,j}^T \tilde{\theta}_{i,j}). \end{aligned} \quad (6)$$

In Eq (4), we adopt a diffuse prior for  $\beta_{i,j}$ , with  $\tau = 1000$  and  $b_{ij}$  as the OLS estimate for  $\beta_{i,j}$  assuming  $U = V = 0$ .

#### A.2 Full Conditionals for the Multiplicative Latent Effects (Step 2)

For each game  $g$  and each player  $i$  who played in game  $g$ , let  $TM_g(i)$  be the set of players who shared the court with  $i$  in game  $g$ . For  $j \in TM_g(i)$  and time  $t$  at which  $i$  possessed the ball and  $j$  was on the court, we have

$$\bar{\theta}_{i,j,g}(t) = u_{i,g}^T v_{j,g} + \epsilon_{i,j,g}(t), \quad (7)$$

where

$$\bar{\theta}_{i,j,g}(t) = \theta_{i,j,g}(t) - X_{i,j,g}(t)^T \beta_{i,j}. \quad (8)$$

Re-writing Eq (7) in matrix form, we have

$$\bar{\theta}_{i,g} = V_{TM_g(i),g}^T u_{i,g} + \epsilon_{i,g}, \quad (9)$$

where  $V_{TM_g(i),g}$  is the matrix with each row being a receiver-specific latent effect vector  $v_{j,g}$  in Eq (7).

Under a normal prior  $u_{i,g} \sim N(0, I_R)$ ,  $p(U_g[i,] | \Theta, \mathbf{V}, \beta)$  is a multivariate normal distribution,

$$U_g[i,] | \Theta, \mathbf{V}, \beta \sim N(w_{i,g}, W_{i,g}), \quad (10)$$

where

$$\begin{aligned} W_{i,g} &= (I_R + V_{TM_g(i),g}^T V_{TM_g(i),g})^{-1}, \\ w_{i,g} &= W_{i,g} (I_R + V_{TM_g(i),g}^T \bar{\theta}_{i,g}). \end{aligned} \quad (11)$$

Very similarly, for each game  $g$  and each player  $j$  who played in game  $g$ , let  $PO_g(j)$  be the set of players who shared the court with  $j$  and ever possessed the ball in game  $g$ . For  $i \in PO_g(j)$  and time  $t$  at which  $i$  was the ballcarrier and  $j$  was on the court, we have (with a slight abuse of notation)

$$\bar{\theta}_{i,j,g}(t) = u_{i,g}^T v_{j,g} + \epsilon_{i,j,g}(t). \quad (12)$$

Re-writing Eq (12) in matrix form, we have

$$\bar{\theta}_{j,g} = U_{PO_g(j),g}^T v_{j,g} + \epsilon_{j,g}, \quad (13)$$

where  $U_{PO_g(j),g}$  is the matrix with each row being a sender-specific latent effect vector  $u_{i,g}$  in Eq (12).

Under a normal prior  $v_{j,g} \sim N(0, I_R)$ ,  $p(V_g[j,]|\Theta, \mathbf{U}, \beta)$  is a multivariate normal distribution,

$$V_g[j,]|\Theta, \mathbf{U}, \beta \sim N(w'_{j,g}, W'_{j,g}), \quad (14)$$

where

$$\begin{aligned} W'_{j,g} &= (I_R + U_{PO_g(j),g}^T U_{PO_g(j),g})^{-1}, \\ w'_{j,g} &= W'_{j,g} (I_R + U_{PO_g(j),g}^T \bar{\theta}_{j,g}). \end{aligned} \quad (15)$$

## B ADDITIONAL PLOTS OF MULTIPLICATIVE LATENT EFFECTS

### B.1 Additional Plots for the AME Model in Section 2

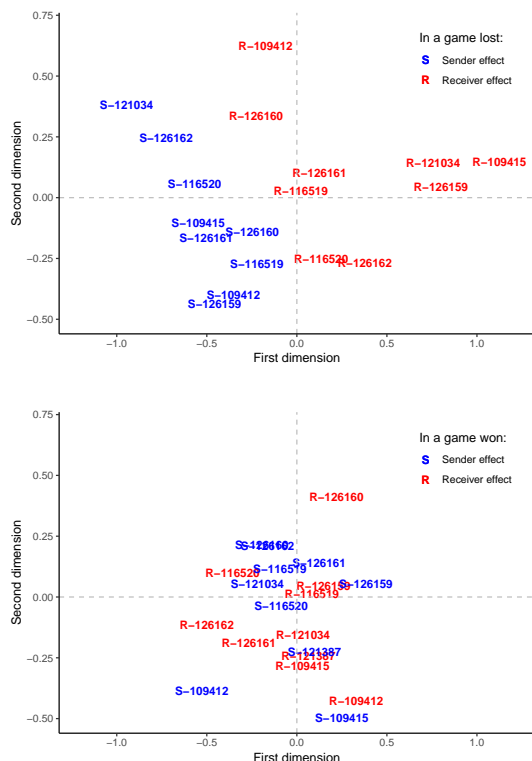

Figure 1: Learned multiplicative sender-specific effects (in blue) and receiver-specific effects (in red) by the AME model in a lost game (top) and a won game (bottom). Each latent effect vector corresponds to a two-dimensional coordinate represented by a player’s id code.

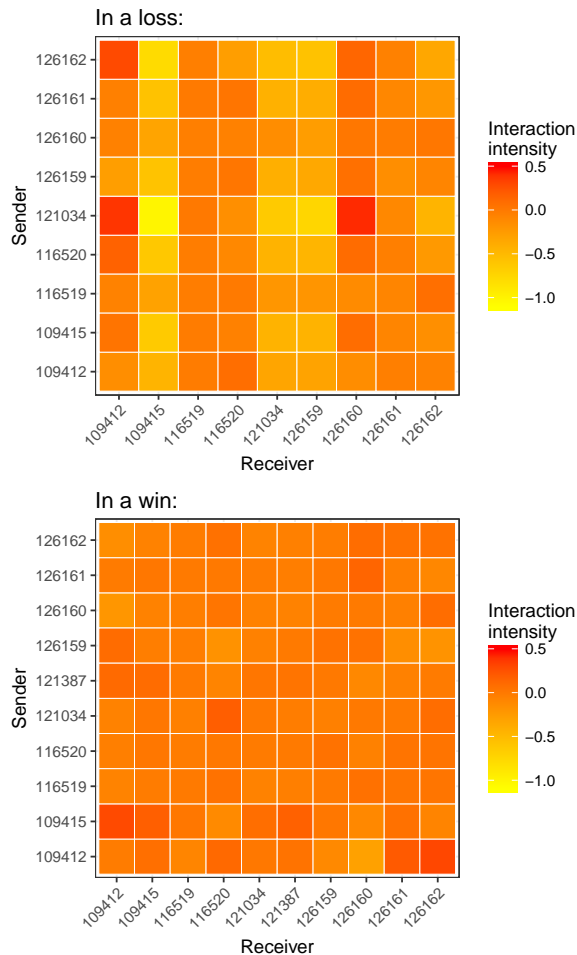

Figure 2: Products of sender- and receiver-specific effects learned in the AME model for all player pairs in a loss (top) and in a win (bottom). Darker color indicates higher frequency of passes. The level of interaction between teammates is significantly higher in a win than in a loss. Furthermore, there are significant passing behavior anomalies in the lost game: player 121034 strongly favors 109412 and 126160 as ball receivers but ignores 109415 as a potential receiver, which is not the case in the victory where his passing choices are more balanced.

B.2 Additional Plots for the Real Data Experiments in Section 4

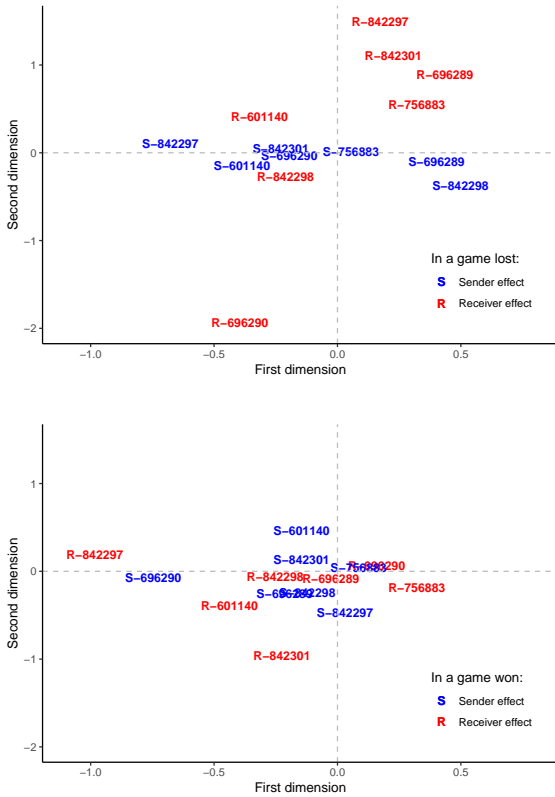

Figure 3: Passing decision multiplicative latent factors in a loss (top) versus in a victory (bottom). Sender-specific effects are marked with “S” plus player id codes in blue, and receiver-specific effects are marked with “R” plus player id codes in red.

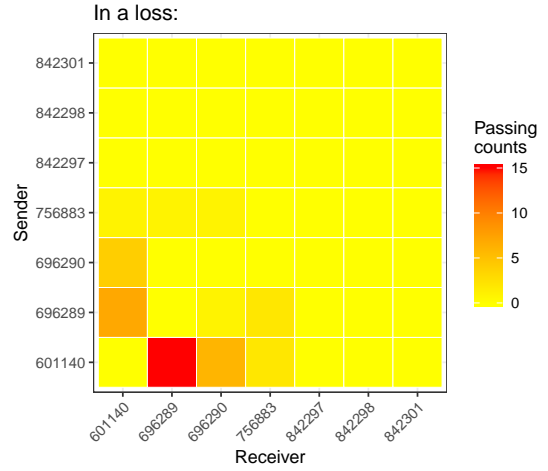

(a) Number of passes between players in a lost game.

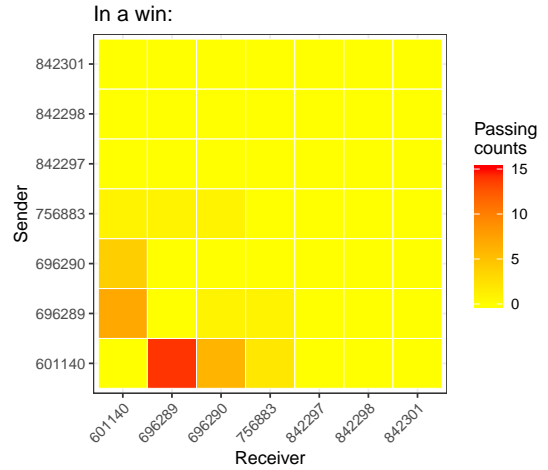

(b) Number of passes between players in a successful game.

Figure 4: Raw passing counts between home team players in a loss versus in a victory. Darker color indicates more passes made from a sender to a receiver. It is obvious that these two plots are disparate from the plots in Fig.5 in the main text, and that the differences between a win and a loss are much harder to observe if only the raw passing counts are examined.
